# Supplementary material for: MHC class II DQB diversity in the Japanese black bear, Ursus thibetanus japonicus
Source: PubMed Central journal article supplement (PMC3575356; doi:10.1186/1471-2148-12-230), 2012-11-29

# Bayesian tree

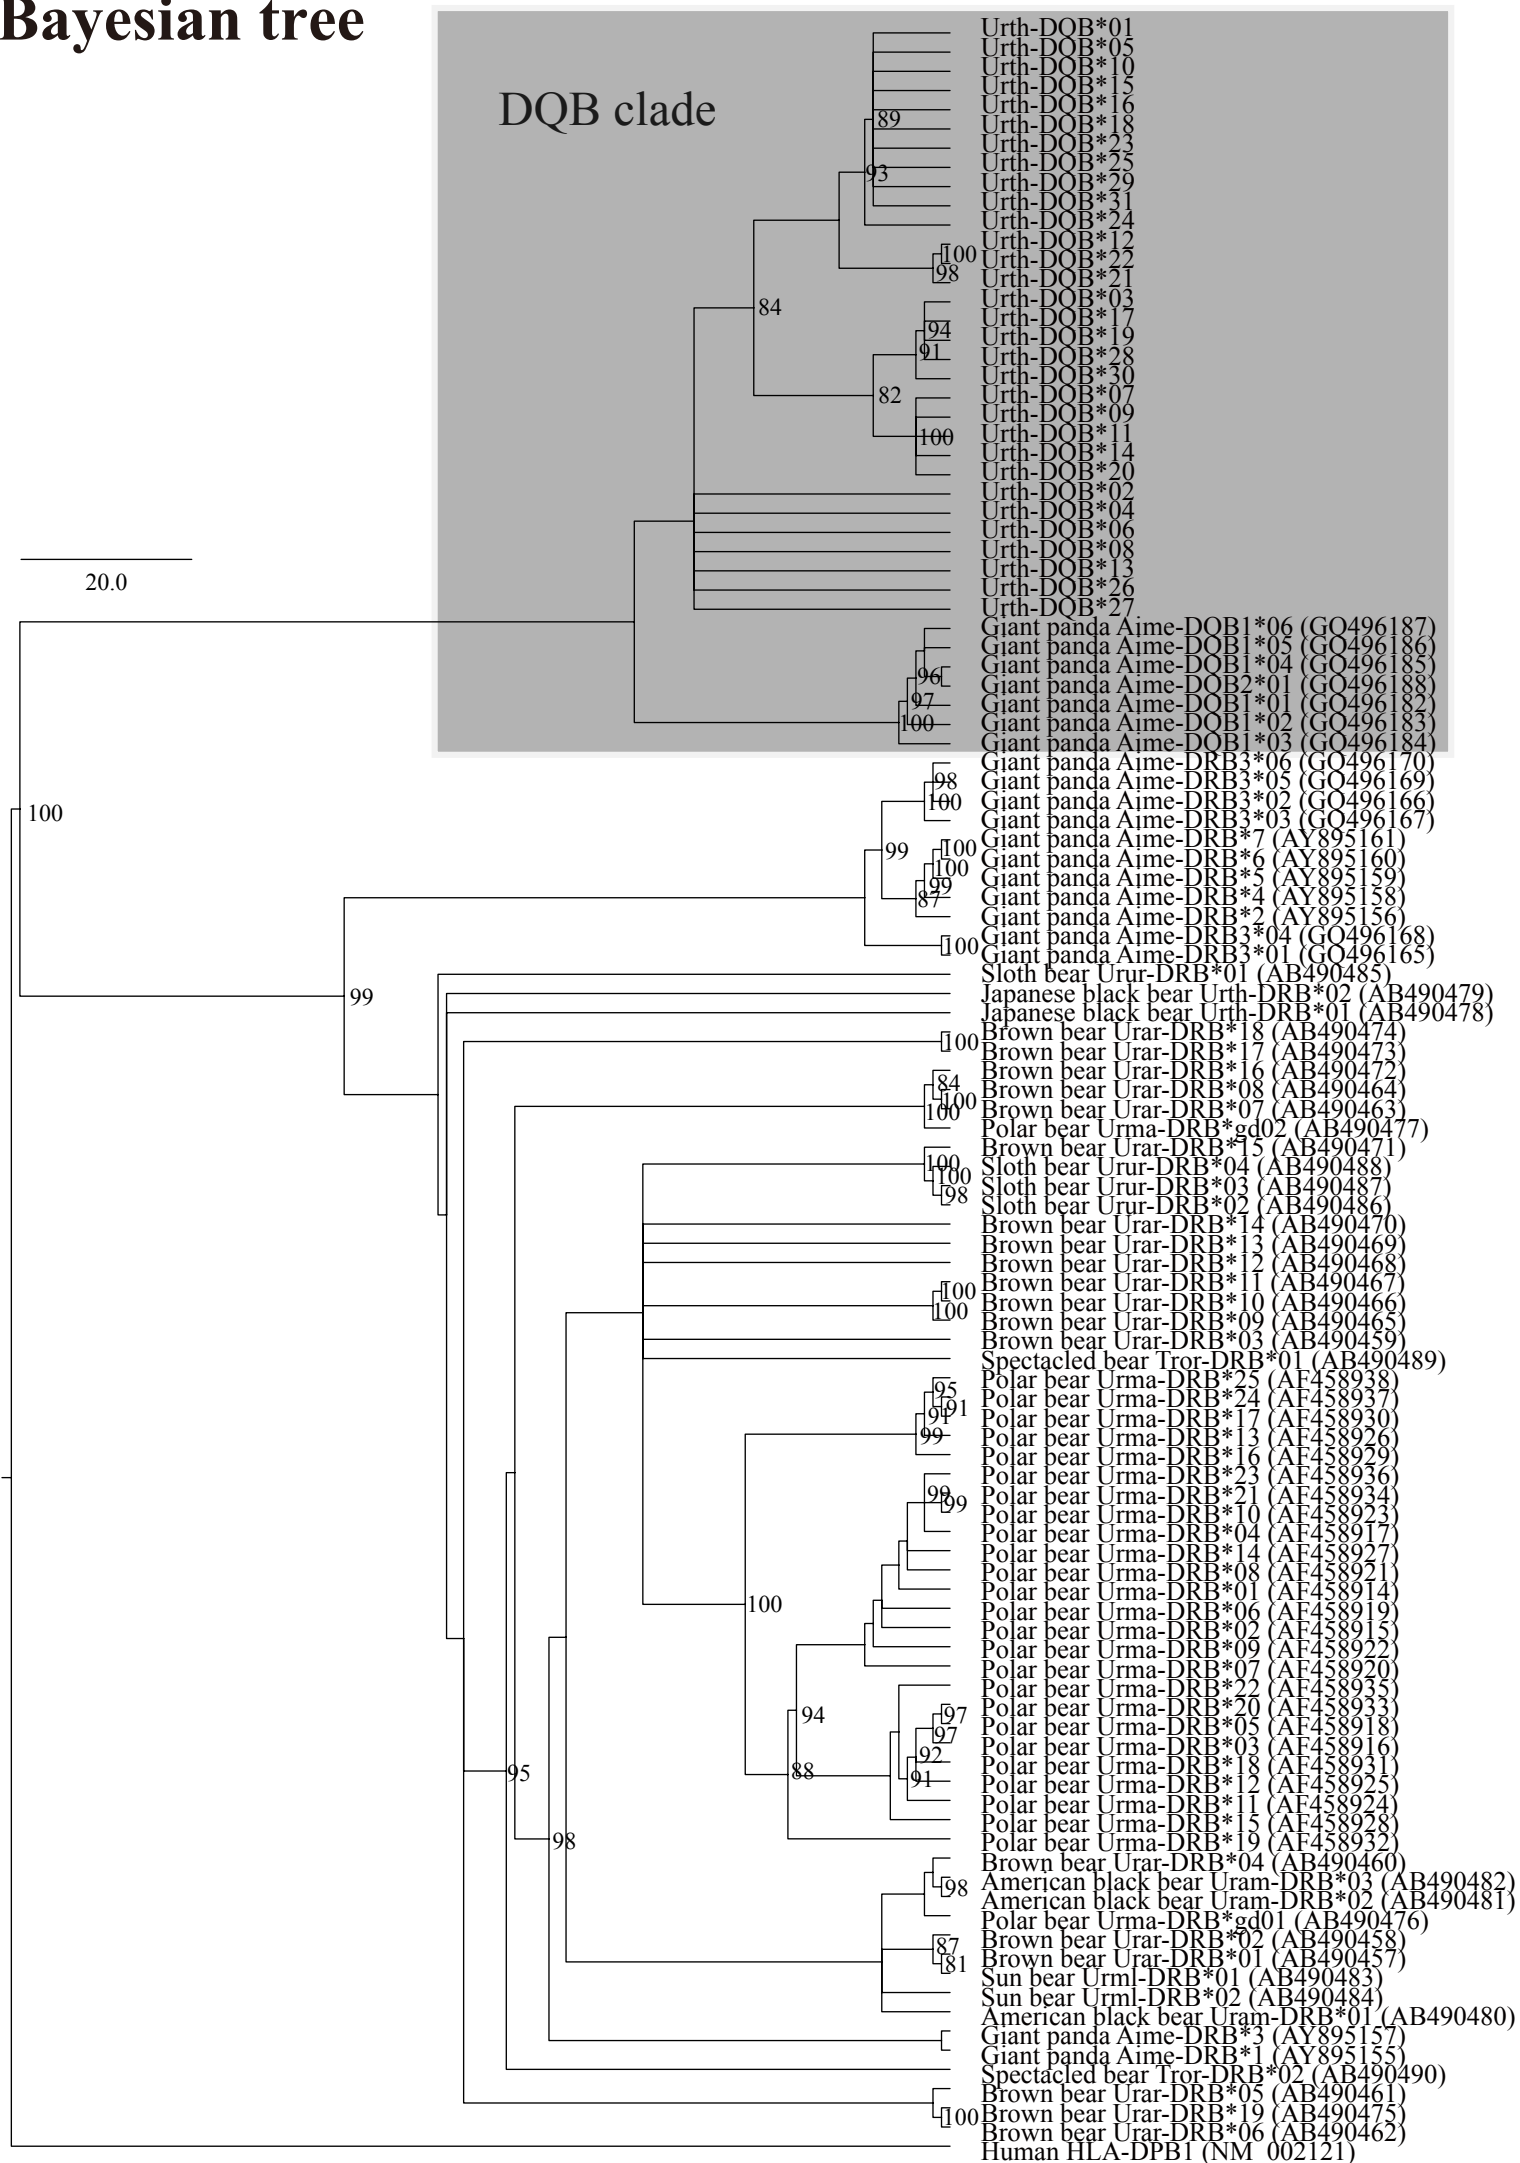

Supplement: 1471-2148-12-230-S1.pdf [file 1471-2148-12-230-S1.pdf]
