# Supplementary material for: MHC class II DQB diversity in the Japanese black bear, Ursus thibetanus japonicus
Source: PubMed Central journal article supplement (PMC3575356; doi:10.1186/1471-2148-12-230), 2012-11-29

(A)

Uncloned  
PCR products

|                                  |   |   |   |   |   |   |   |
|----------------------------------|---|---|---|---|---|---|---|
| 97UR87 URDQEx2-F4.C04 0812260390 | G | A | T | T | C | G | T |
| 97UR87 URDQEx2-R4.C05 08123017S9 | G | A | T | T | C | G | T |
| 97UR87-1 M13R.A10 08121914TC     | G | A | T | T | C | G | T |
| 97UR87-2 M13R.B10 08121914TC     | G | A | T | T | C | G | T |
| 97UR87-3 M13R.C10 08121914TC     | G | A | T | T | C | G | T |
| 97UR87-9 M13R.A11 08121916FB     | G | A | T | T | C | G | T |
| 97UR87-10 M13R.B11 08121916FB    | G | A | T | T | C | G | T |
| 97UR87-6 M13R.F10 08121921RS     | G | A | T | T | C | G | T |
| 97UR87-8 M13R.H10 08121921SH     | G | A | T | T | C | G | T |
| 97UR87-4 M13R.D10 08121921R6     | G | A | T | T | C | G | T |
| 97UR87-5 M13R.E10 08121914TC     | G | A | T | T | C | G | T |
| 97UR87-7 M13R.G10 08121914TC     | G | A | T | T | C | G | T |
| 97UR87-11 M13R.C11 08121921TH    | G | A | T | T | C | G | T |
| 97UR87-12 M13R.D11 08121916FB    | G | A | T | T | C | G | T |

Cloned PCR  
products

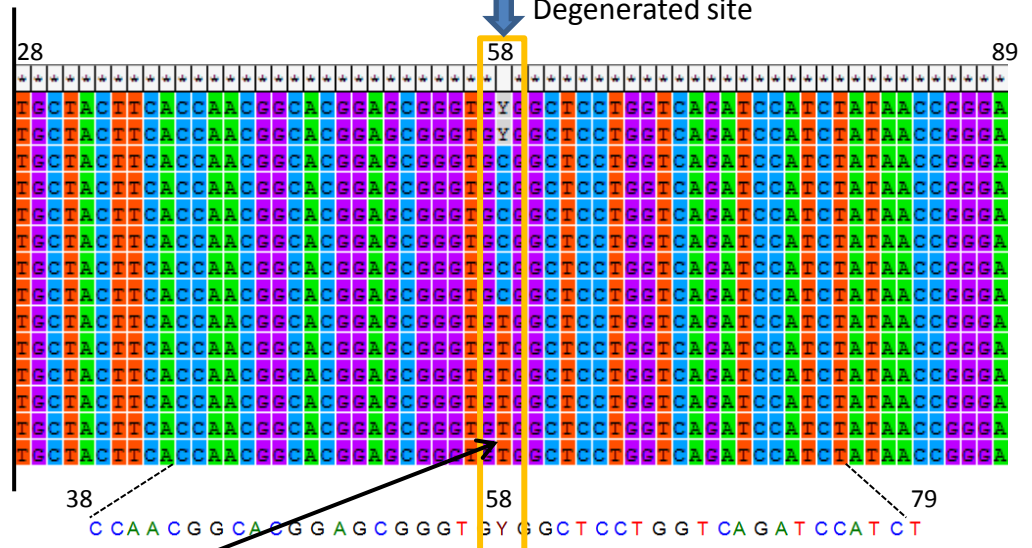

The frequencies of Cytosine and  
Thymine are nearly equal.

The double peak is clear.  
(Cytosine and Thymine)

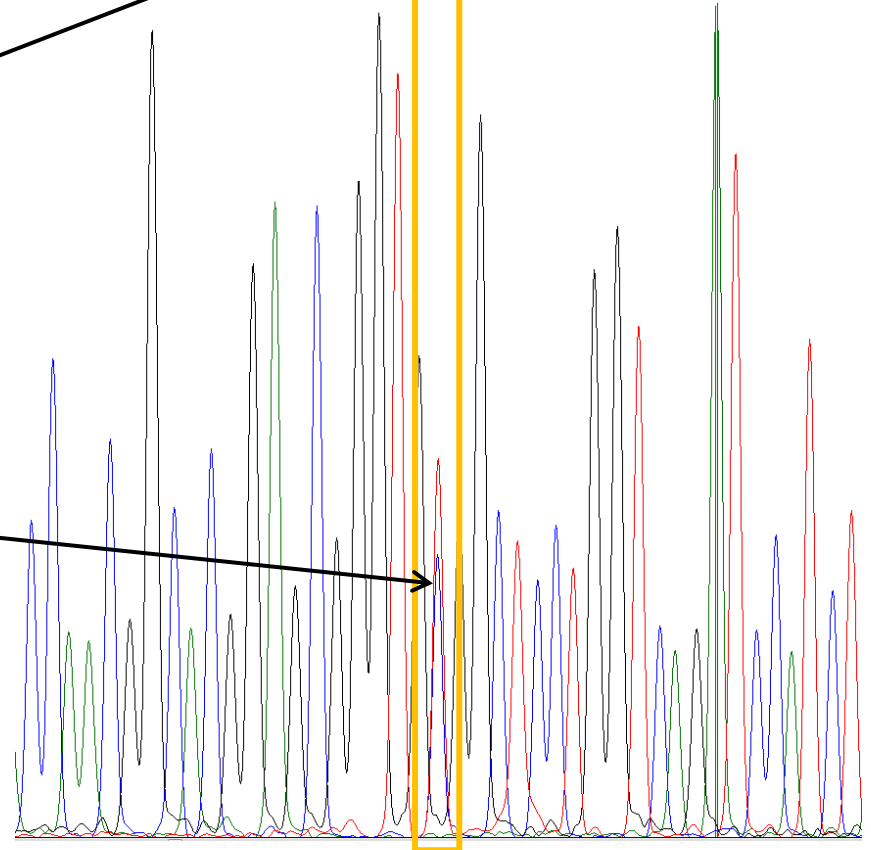

Supplement: 1471-2148-12-230-S2.pdf [file 1471-2148-12-230-S2.pdf]
